# Supplementary material for: IPO11 regulates the nuclear import of BZW1/2 and is necessary for AML cells and stem cells
Source: PubMed Central journal article supplement (PMC9061300; doi:10.1038/s41375-022-01513-4), 2022-02-12
Supplement: 41375_2022_1513_MOESM1_ESM.pdf [file 41375_2022_1513_MOESM1_ESM.pdf]

## 1 **Bioinformatic Analysis**

### 2 Haferlach AML cohort

3 Affymetrix gene expression data of AML (542 samples) and healthy bone marrow  
4 samples (73 samples) from the Haferlach dataset (GSE13159) was downloaded from the  
5 leukemia gene atlas (<http://www.leukemia-gene-atlas.de>)<sup>16</sup>. The platform used is  
6 Affymetrix Human Genome U133 Plus 2.0 Array and the data values correspond  
7 to Robust Multichip Average (RMA) expression measure. Official gene symbols from the  
8 Hugo Gene Nomenclature Committee were retrieved from the Affymetrix probe identifiers  
9 using the R package 'biomaRt'. Data was reduced at the gene level by selecting the probe  
10 with the highest median absolute deviation (MAD) across samples per gene. In order to  
11 study the pattern expression of IPO11 between AML, normal patients and within the AML  
12 samples, data were centered, scaled and clustered using the heatmap.2 function  
13 available from the gplots R package. Using the default parameters, each row (gene) in  
14 the result has mean 0 and sample standard deviation 1. Hierarchical clustering of the  
15 samples was done with the Euclidean distance metric and the complete linkage method  
16 on the scaled data. Data distribution of AML, normal samples and the four cluster groups  
17 were visualized using boxplots of scaled data.

18

### 19 Diagnosis/Relapse AML cohort.

20 Gene expression between diagnosis and relapse AML samples were obtained from a  
21 previous study by Shlush *et al.*<sup>2</sup>. TMM-normalized counts between diagnosis and relapse  
22 were compared using the edgeR likelihood ratio test and tests were corrected for multiple  
23 hypothesis testing using the Benjamini-Hochberg procedure. An expression score that

24 ranks genes from top up regulated in the relapse samples to top down regulated when  
25 compared to diagnosis was calculated using the formula  $-\log_{10}(\text{pvalue}) * \text{sign}(\log\text{FC})$   
26 ROc and ROp categories were taken from the above-mentioned work by Shlush *et al.*<sup>2</sup> to  
27 categorize these AMLs into progenitor-like and myeloid-like respectively.

28

29 TCGA cohort.

30 Raw counts from 179 AML samples from the LAML TCGA data were downloaded from  
31 the GDC portal (<https://portal.gdc.cancer.gov/>). AMLs were categorized into Roc/progenitor-  
32 like or Rop/myeloid-like as described<sup>2</sup>. TMM-normalized counts between Roc/progenitor-  
33 like and Rop/myeloid-like categories were compared using the edgeR likelihood ratio test  
34 and tests were corrected for multiple hypothesis testing using the Benjamini-Hochberg  
35 procedure. An expression score that ranks genes from top up regulated in the  
36 Roc/progenitor-like fractions to top down regulated when compared to Rop/myeloid-like  
37 was calculated using the formula  $-\log_{10}(\text{pvalue}) * \text{sign}(\log\text{FC})$ .

38

39 beatAML cohort

40 CPM normalized counts of 451 AML samples were obtained from Tyner *et al.*<sup>17</sup>.

41 LSC+/LSC- and CD34+CD34- AML gene expression data

42 Illumina beadchip transcriptomics data containing LSC+, LSC-, CD34+ and CD34- sorted  
43 AML fractions were obtained from the Gene Expression Omnibus data portal  
44 (GSE76008)<sup>18</sup> and differential expression between LSC+/LSC- and CD34+/CD34-  
45 fractions was calculated using a moderated t test available in the limma R package  
46 3.28.21 incorporating array batch effects in the linear model. An expression score that

47 ranks genes from top up regulated in the LSC+ fractions to top down regulated when  
48 compared to LSC- fractions was calculated using the formula  $-\log_{10}(\text{pvalue}) * \text{sign}(\log\text{FC})$ .

50 Overall survival analysis:

51 IPO11 expression from TCGA and BeatAML datasets were divided into 2 groups – high  
52 and low – using a median split. Samples were divided to 3 categories: poor Cytogenetic  
53 risk, LSC17 score high or LSC17 score low. The proportions over the total number  
54 samples were calculated and the significance of the difference between the proportions  
55 between the IPO11 low and high groups was estimated using the Pearson's chi-squared  
56 test statistic using the R `prop.test` function.

57

## 58 **Plasmids and transduction**

### 59 *shRNA knockdown*

60 The coding sequence of shRNAs and the control shRNA targeting the GFP sequence  
61 (GFP, accession number clonetechnGfp\_587s1c1) are as follows:

62

### 63 **IPO11 (accession no. NM\_016338):**

64 shRNA 1 (CDS region):

65 5'-CCGGAGATCAGTTTCTACCGTATTTCTCGAGAAATACGGTAGAAACTGATCTTTTTTG

66 shRNA 2 (3UTR region):

67 5'-CCGGGCTGAGATGAAGAAATCACTTCTCGAGAAGTGATTTCTTCATCTCAGCTTTTTTG

### 68 **BZW1 (accession no. NM\_014670)**

69 shRNA 1 (CDS region):

70 5'-CCGGGCAGTAGCTAAGTTTCTTGATCTCGAGATCAAGAACTTAGCTACTGCTTTTTTG

71 shRNA 2 (CDS region):

72 5'- CCGGGCAGAAACACTCTTTGACATTCTCGAGAATGTCAAAGAGTGTTTCTGCTTTTTTG

73 **BZW2 (accession no. NM\_014038):**

74 shRNA 1 (CDS region):

75 5'- CCGGCAGAAGATTGTGGTTCTTTCTCGAGAAAGAGAACCACAATCTTCTGTTTTTTG

76 shRNA 2 (CDS region):

77 5'- CCGGGCTGATGTTCTGAGCGAAGAACTCGAGTTCTTCGCTCAGAACATCAGCTTTTTTG

78 **TYK2 (accession no. NM\_003331):**

79 shRNA #1(CDS):

80 5'- CCGGCGAGCACATCATCAAGTACAACCTCGAGTTGTAAGTATGATGTGCTCGTTTTTTTG

81

82 shRNA #2 (UTR):

83

84 5'-

85 CCGGGATGTCAGCCTCACCCACACCCTCGAGGGTGTGGGTGAGGCTGACATCTTTTTTTG

86

87 shRNA #3 (UTR):

88

89 5'-

90 CCGGCGTGAGCCTAACCATGATCTTCTCGAGAAGATCATGGTTAGGCTCACGTTTTTTTG

91

92

93 **Lentiviral packing**

94 The above mentioned vectors (The hairpin-pLKO.1, pLKO, pLentiEF1a, pRS19 and  
95 pLENTI-C-HA) were isolated using the E.N.Z.A® Plasmid Midi Kit system (Omega bio-  
96 tek), and then quantified by the NanoDrop™ (ThermoFisher Scientific)  
97 spectrophotometer. Lentiviruses were made in a 25 cm<sup>2</sup> flask format, by transfecting  
98 packaging cells (293T) with a three-plasmid system (gag, pol, and rev genes, and  
99 envelope plasmid), as previously described<sup>5</sup>. For 8227 cells and primary AML cells  
100 transduction, lentivirus was made in a 175 cm<sup>2</sup> flask format, by transfecting 293T cells

101 with a three-plasmid system. The virus was concentrated using the Lenti-X Concentrator  
102 as per manufacturer's instructions.

103

#### 104 **Transduction of AML Cell Lines**

105 To perform lentiviral transductions,  $1.0 \times 10^6$  OCI-AML2 cells were centrifuged and  
106 resuspended in 3 mL of medium containing 5  $\mu\text{g}/\text{mL}$  of protamine sulfate. 1 mL of virus  
107 was added to these cells,  $5 \times 10^6$  NB4 and TEX cells were resuspended in 5 mL of  
108 medium containing 5  $\mu\text{g}/\text{mL}$  of protamine sulfate. 2 mL of virus was added to TEX cells  
109 and 1 mL to NB4 cells, followed by an overnight incubation ( $37^\circ\text{C}$ , 5%  $\text{CO}_2$ ). The following  
110 day, fresh medium with puromycin (1.5  $\mu\text{g}/\text{mL}$  for OCI-AML2 and NB4 or 2  $\mu\text{g}/\text{mL}$  for  
111 TEX) was added to cells. Three days later, the medium was replaced with non-puromycin  
112 containing media. For CAS9-OCI-AML2 cells transduced with IPO11 CRISPR-sgRNA  
113 knockout, culture was continued for additional 7 days in a selection-free medium prior to  
114 analysis.

115 For dual BZW1/ BZW2 knockdown, OCI-AML2 cells were initially transduced with  
116 shBZW2 pLKO MISSION custom vector with G418 selection (Sigma Aldrich, Missouri,  
117 USA). Cells were cultured in G418 (1.5  $\mu\text{g}/\text{ml}$ ) for 6 days, and then transduced with  
118 shBZW1 pLKO-Puro vector, as described above. Dual knockdown was confirmed by  
119 qPCR.

120

#### 121 **Transduction of primary AML cells and 8227 cells**

122 24-well plates were coated with 250  $\mu\text{L}$  of RetroNectin® (20  $\mu\text{g}/\text{mL}$  in PBS) per well for 2  
123 hours at room temperature. The wells were blocked with 1 mL of 2% BSA (W/V) for 30

124 minutes at room temperature. The BSA solution was then aspirated, and concentrated  
125 lentiviral particles in HBBS with 25 mM HEPS were added to each well at a volume of 0.5  
126 mL. The plate was then centrifuged at 3,000 rpm for 5 hours at room temperature to  
127 promote the attachment of lentiviral particles to RetroNectin. Next, 0.4mL of the viral  
128 supernatant was aspirated.  $5 \times 10^5$  cells were added to each well in 1 mL of X-VIVO 10  
129 (20% BIT, 50 ng/ml Flt3-L, 10 ng/mL IL6, 50 ng/mL SCF, 25 ng/mL TPO, 10 ng/mL IL3,  
130 10 ng/mL G-CSF). The plate was then centrifuged again at 1,300 rpm for 10 minutes at  
131 room temperature to promote the interaction between the cells and lentiviral particles,  
132 and then transferred to a 37°C incubator to initiate lentiviral transduction. Twenty-four  
133 hours afterward, the cells were resuspended in fresh media at a concentration of  $1 \times 10^6$   
134 cells/mL and seeded in a 24-well plate at 1 mL per well. Knockdown was confirmed by  
135 qPCR following sorting of GFP positive cells at 48 hours post-infection.

136

137

### 138 **qRT-PCR**

139 Total RNA was isolated using the RNeasy Plus Mini Kit (QIAGEN), and cDNA was  
140 prepared using SuperScript IV Reverse Transcriptase (ThermoFisher, MA, USA). Equal  
141 amounts of cDNA for each sample were added to a prepared master mix (Power SYBR  
142 Green PCR Master mix; Applied Biosystems, CA, USA). Quantitative real time  
143 polymerase chain (qRT-PCR) reactions were performed on an ABI Prism 7900 sequence  
144 detection system (Applied Biosystems, CA, USA). To normalize for equal amounts of  
145 cDNA we assayed the transcript levels of 18srRNA gene. The comparative CT method  
146 was calculated as per manufacturer's instructions.

147

## 148 **RNA sequencing and analysis**

149 IPO11 and BZW1/2 KD RNA-Sequencing

150 RNA was isolated from OCI-AML2 cells 7 days post-transduction with shRNA targeting

151 IPO11 or control and was sequenced (Illumina Nextseq2500). Prior to analysis, read

152 adapters and low-quality ends were removed using Trim Galore v. 0.4.0. Reads were

153 aligned against hg19 using Tophat v. 2.0.11. Read counts per gene were obtained

154 through htseq-count v.0.6.1p2 in the mode "intersection\_nonempty".

155 Gene read counts were normalized using the TMM method available from the

156 edgeR\_3.24.3 package. After removing genes whose cpm (counts per million reads) were

157 less than 0.5 to remove noise, edgeR was used to estimate differential expression by

158 applying a generalized linear model between the control samples and the cells isolated

159 after IPO11 or BZW KD. A score that ranks genes from top up regulated in the KD

160 samples to top down regulated when compared to control samples was calculated using

161 the formula  $-\log_{10}(\text{pvalue}) * \text{sign}(\log\text{FC})$ . Raw data was deposited in GEO repository,

162 GSE173288.

163

## 164 **Pathway and Network Analysis**

165 Gene set enrichment analysis (GSEA software,

166 <http://software.broadinstitute.org/gsea/msigdb/>) was used to compare IPO11KD/control

167 and BZW1.2/control cell samples using the 2 corresponding ranked lists of genes and the

168 Baderlab gene-set file (<http://baderlab.org/GeneSets>) as the pathway database. GSEA

169 was run using default parameters. GSEA results were visualized as a network using

170 Cytoscape 3.7.1 and Enrichmentmap 3.2.1. AutoAnnotate 1.3.2 automatically labelled  
171 pathway modules using most frequent words. LSC+ and LSC- gene lists were added as  
172 gene-sets to the enrichment map and the significance of overlap with gene-sets was  
173 calculated using the EnrichmentMap post analysis integrated hypergeometric test. GSEA  
174 was also used using the LSC+/LSC- rank file the CRISPR and Relapse specific genes  
175 selected at FDR 0.05 as gene-sets. Importin network was created using Cytoscape 3.7.1  
176 and the STRING app.

177 Single sample gene set enrichment analysis (ssgsea) was run using the R package  
178 GSVA\_1.30.0 using normalized counts per million (CPM) on the TCGA, beatAML and  
179 Haferlach cohorts. Sgsea was run against AML derived HSC/ progenitor, and myeloid  
180 specific gene lists (Supplementary reference<sup>1</sup>). Enrichment scores were row normalized  
181 and visualized as a heatmap using the gplots R package. Samples with a positive  
182 enrichment score for the HSC/Progenitor gene list and a negative enrichment score for  
183 the myeloid gene list were classified as HSC/Progenitor and the other cases were  
184 classified as myeloid.

185

## 186 **ATAC sequencing and analysis**

187 ATAC samples were preprocessed according to the ENCODE ATAC-seq pipeline. Single-  
188 end reads were aligned to the hg38 genome using Bowtie2 (Supplementary reference<sup>2</sup>),  
189 with the--local parameter, reads with MAPQ scores < 30 were filtered out with Samtools  
190 (Supplementary reference<sup>3</sup>), duplicates were removed using Sambamba (Supplementary  
191 reference<sup>4</sup>) and TN5 tagAlign shifted files were created. MACS2 (Supplementary  
192 reference<sup>5</sup>) was used to call peaks with the following parameters: -p 0.01--shift 75--extsize



193 150–nomodel -B–SPMR –keep-dup all–call-summits. Peaks were later filtered at a q-  
194 value threshold of 0.0001 for further analyses. Peak counts and sizes for each replicate  
195 were calculated using a custom Python script, and Jaccard indices for similarities  
196 between called peaks was calculated using BEDTools (Supplementary reference<sup>6</sup>)  
197 Differentially accessible regions were calculated using the DiffBind and EdgeR  
198 (Supplementary reference<sup>7</sup>) packages in R. Regions with an FDR value  $\leq 0.05$  were  
199 defined as significantly differentially accessible regions.

200

## 201 **Immunocytochemistry**

202 Cells were seeded on 18mm coverslips and were subjected to treatment 48hrs post-  
203 seeding. Following treatments, cells were fixed using 4% paraformaldehyde (Bioshop  
204 cat: PAR070) for 15min and permeabilized using 0.1% Triton-X 100 (Sigma cat: X100-  
205 5ML) for 10min at room temperate. Coverslips were incubated using a blocking solution  
206 comprising of 10% FBS, 5% BSA (Bioshop cat: ALB001), 1% fish skin gelatin (Sigma cat:  
207 G7765), and 0.25% Triton X-100 (Sigma cat: X100-5ML) in PBS for 2hrs at room  
208 temperature. After blocking, coverslips were incubated with primary antibody, anti- $\gamma$ H2AX  
209 (1:500) (Millipore cat: 05-636 JBW301, clone JBW301), diluted in blocking solution  
210 overnight at 4oC with gentle agitation. Following washes with PBS + 0.05% Tween 20  
211 (PBST), slides were stained with secondary antibodies conjugated to Alexa-Fluor 488  
212 (Invitrogen cat: A11008, A11001) at room temperature for 2hrs at a concentration of 1:500  
213 while protected from light. Following washes with PBST, coverslips were counterstained  
214 with DAPI (Invitrogen cat: D1306) and mounted using MOWIOL (Sigma cat: 81381).  
215 Slides were allowed to dry overnight before visualization and analysis. All

216 immunofluorescence images were taken using a Lecia DM4000 B fluorescence  
217 microscope using 63X or 100X magnification. Image J software (FIJI) (National Institutes  
218 of Health) was used to process and score  $\gamma$ H2AX nuclear staining intensity by first using  
219 the DAPI signal to create nuclei masks and measuring fluorescence intensity. 10 random  
220 fields of view were measured per experiment. Microscope exposure settings were held  
221 constant within each experiment.

222

## 223 **References**

- 224 1. van Galen P, Hovestadt V, Wadsworth li MH, et al. Single-Cell RNA-Seq Reveals  
225 AML Hierarchies Relevant to Disease Progression and Immunity. *Cell*.  
226 2019;176(6):1265-1281.e24.
- 227 2. Langmead B, Salzberg SL. Fast gapped-read alignment with Bowtie 2. *Nat. Methods*.  
228 2012;9(4):357–359.
- 229 3. Li H, Handsaker B, Wysoker A, et al. The Sequence Alignment/Map format and  
230 SAMtools. *Bioinforma. Oxf. Engl.* 2009;25(16):2078–2079.
- 231 4. Tarasov A, Vilella AJ, Cuppen E, Nijman IJ, Prins P. Sambamba: fast processing of  
232 NGS alignment formats. *Bioinformatics*. 2015;31(12):2032–2034.
- 233 5. Zhang Y, Liu T, Meyer CA, et al. Model-based Analysis of ChIP-Seq (MACS).  
234 *Genome Biol.* 2008;9(9):R137.
- 235 6. Quinlan AR. BEDTools: The Swiss-Army Tool for Genome Feature Analysis. *Curr.*  
236 *Protoc. Bioinforma.* 2014;47:11.12.1-34.
- 237 7. Robinson MD, McCarthy DJ, Smyth GK. edgeR: a Bioconductor package for  
238 differential expression analysis of digital gene expression data. *Bioinformatics*.  
239 2010;26(1):139–140.

240

241

242

243

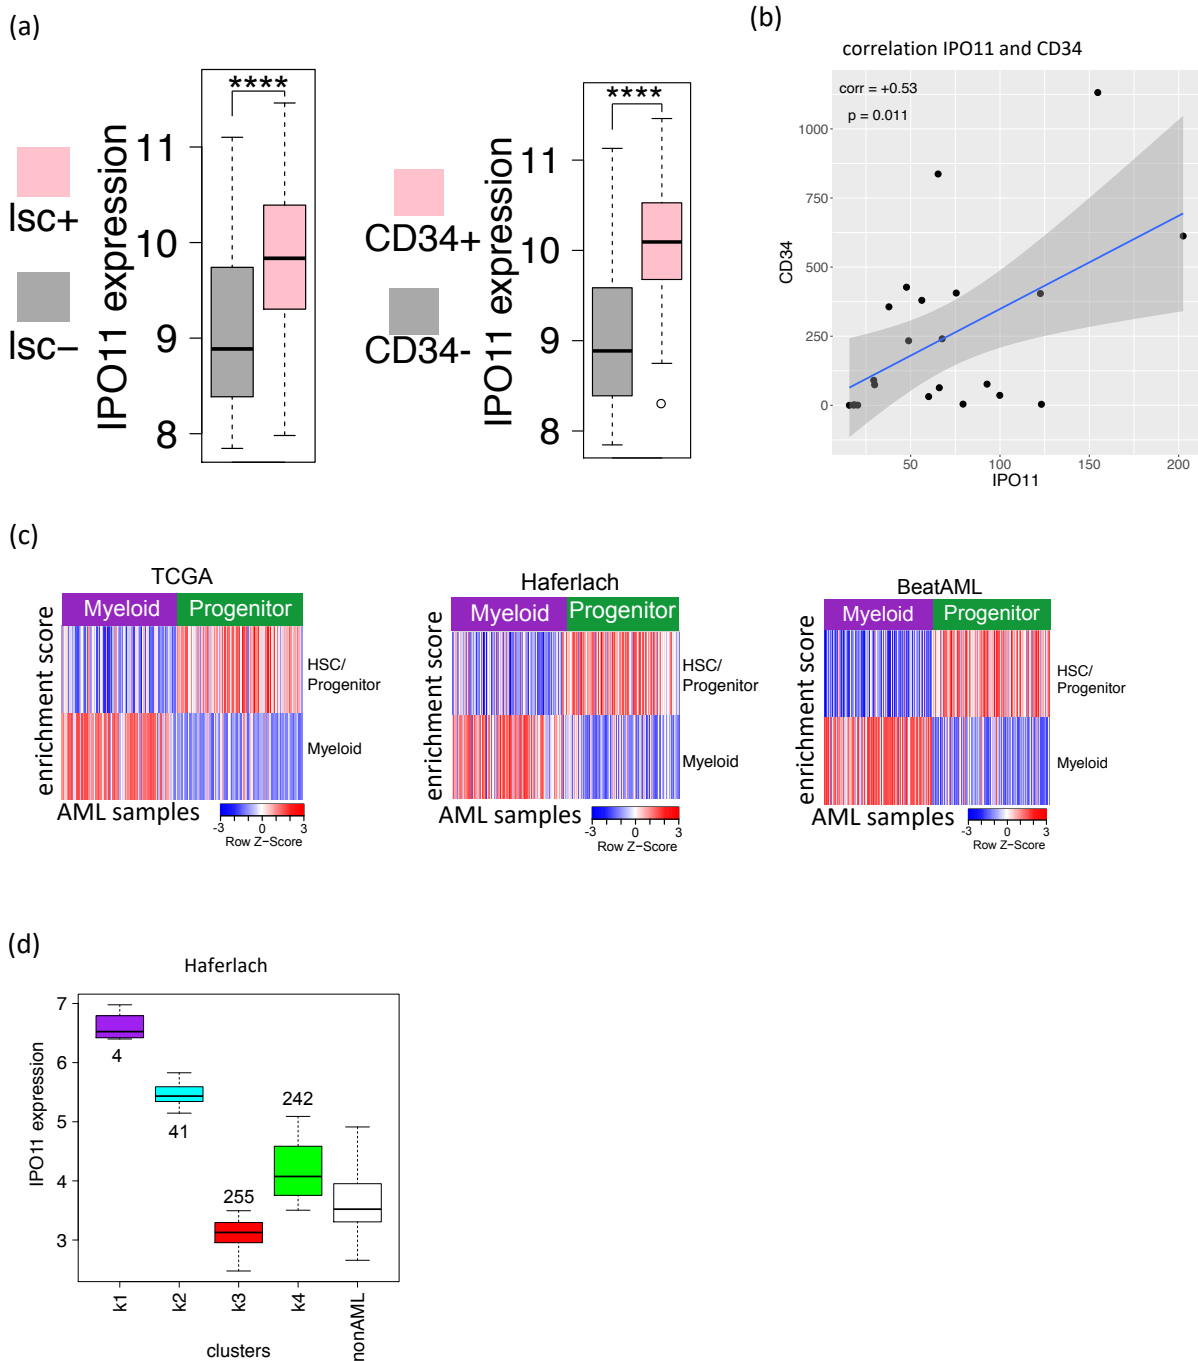

**Figure S1: IPO11 expression in AML**

(a) Expression of IPO11 expression in LSC+ vs. LSC- and CD34+ vs. CD34- AMLs in the GSE76008 dataset, p value  $\leq 0.0001$ (\*\*\*\*).

(b) Correlation of IPO11 with CD34 gene expression in 11 relapse/diagnosis paired samples.

(c) Heatmap of normalized enrichment score of AML samples classified as myeloid or HSC/progenitor from different cohorts.

(d) Expression pattern and hierarchical clustering of IPO11 gene expression data from 536 primary human AML and 73 normal bone marrow samples (designated non-AML, Haferlach AML cohort). One Way Analysis of Variance and pairwise t-tests were applied to test the significance of the differences in the mean values between the groups,  $p < 0.0001$ .

(a)

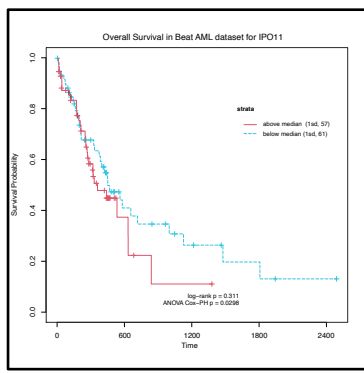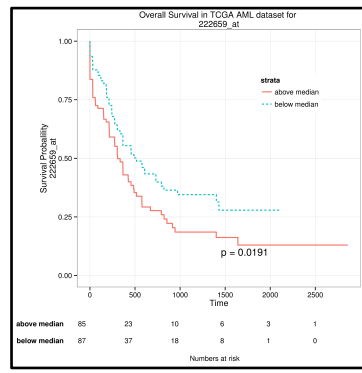

(b)

IPO11: median split

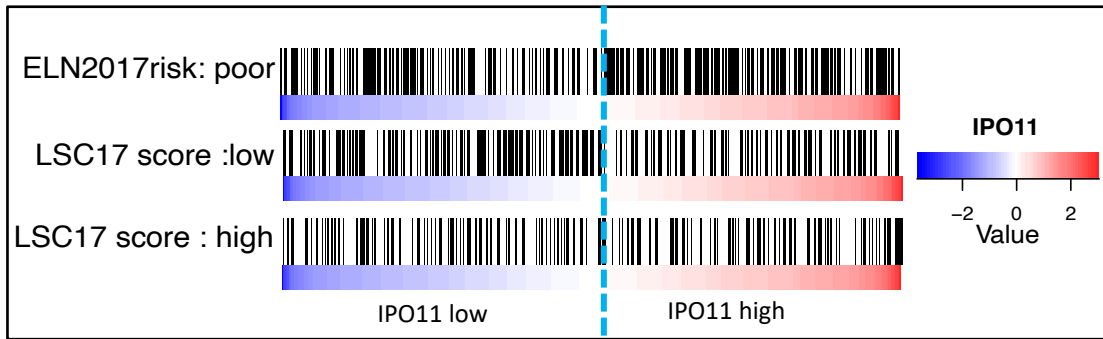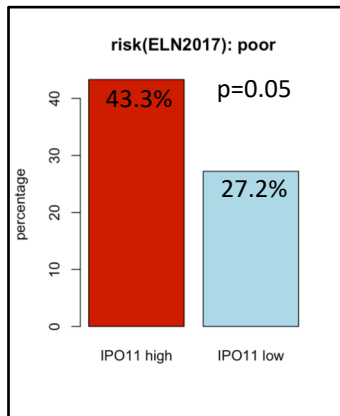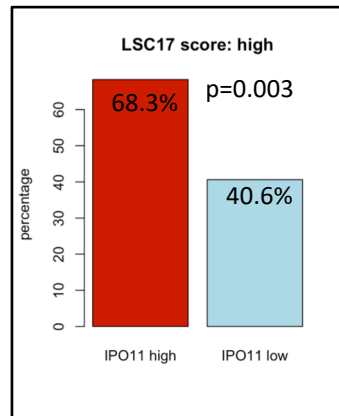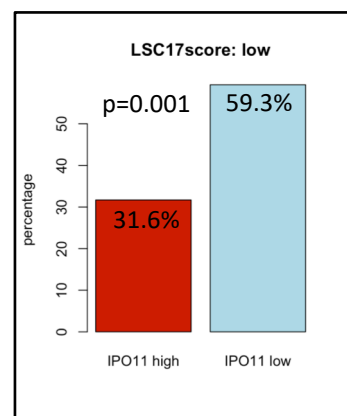

(c)

Diagnosis vs. relapse

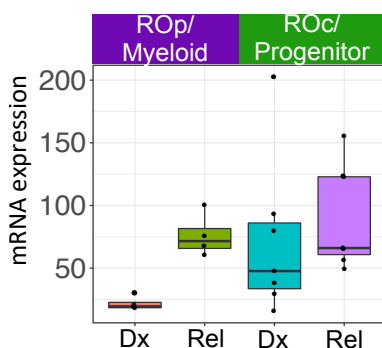

(d)

Expression in LSC+ vs. LSC-

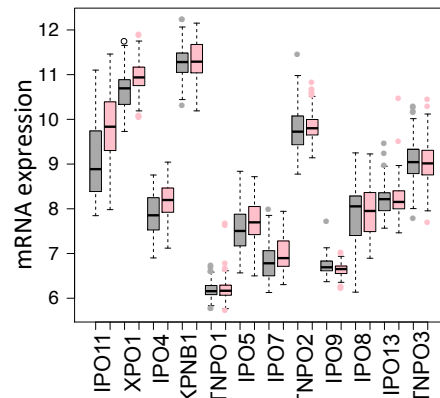

(e)

Diagnosis vs. relapse

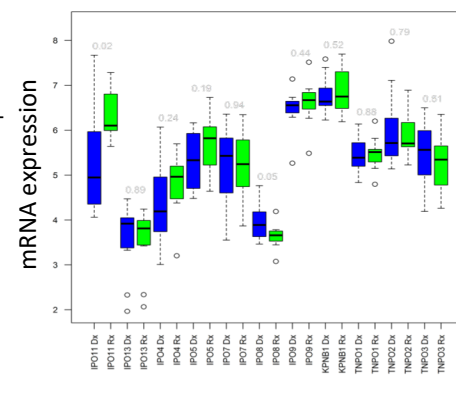

**Figure S2: IPO11 expression with regard to overall survival and risk stratification**

(a) Overall survival stratified by median IPO11 expression in the Beat AML and TCGA databases.

(b) IPO11 expression by ELN17 risk stratification and LSC17 score

(c) IPO11 gene expression in 11 paired diagnosis/relapse AML samples fractionated into myeloid-like and HSC/Progenitor like AMLs.

(d) Ranking of importin  $\beta$  family members according to LSC fractions described above.

(e) Analysis of importin  $\beta$  family members expression in paired diagnosis/relapse samples.

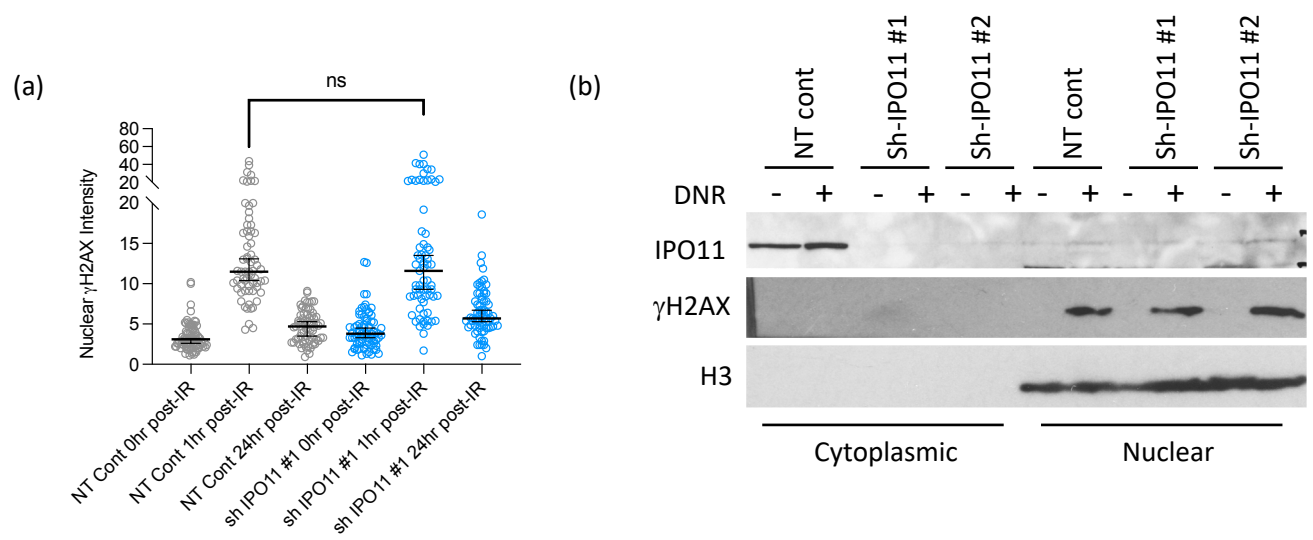

**Figure S3: DNA damage response is not affected by IPO11 knockdown**

**(a)** OCI-AML2 cells transduced with shRNA targeting IPO11 or control were irradiated (5Gy) and stained for nuclear g-H2AX. Image J software (FIJI) (National Institutes of Health) was used to process and score γH2AX nuclear staining intensity by first using the DAPI signal to create nuclei masks and measuring fluorescence intensity. 10 random fields of view were measured per experiment.

**(b)** OCI-AML2 cells transduced with either shRNA targeting IPO11 or control were treated with Daunorubicin 100 nM for 20 hours. Cytoplasmic and nuclear extracts were generated and blotted for IPO11, phosphor- g-H2AX and Histone-3 (H3)

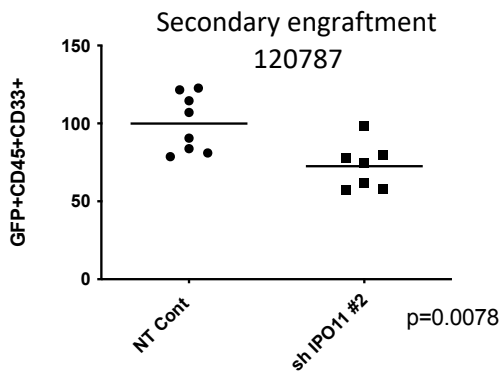

**Figure S4: IPO11 is necessary for LSC function**

Primary AML cells were transduced with shRNA targeting IPO11 or control sequences in lentiviral vectors containing a GFP marker. 2 days after transduction, equal numbers of viable cells were injected into sub-lethally irradiated NOD-SCID mice preconditioned with anti-CD122. Eight weeks after injection, the percentage of human GFP+, CD33+ and CD45+ cells in the non-injected left femur was determined by flow (see Figure 3e). Same number of cells were further engrafted to assess secondary engraftment.

(a)

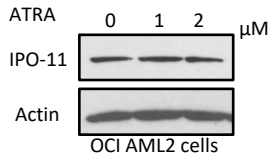

(b)

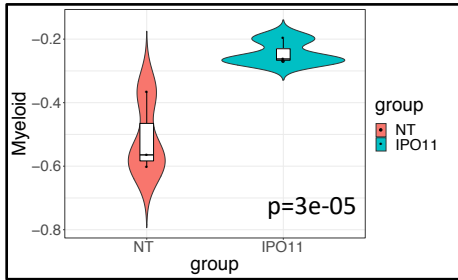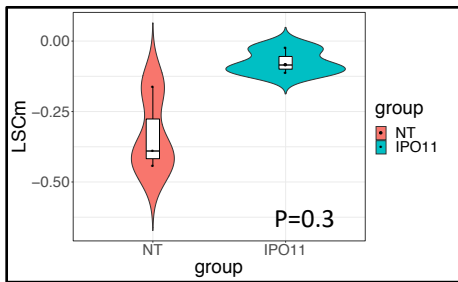

**Figure S5: IPO11KD promotes differentiation**

- (a) IPO11 protein levels 4 hours after treatment of OCI-AML2 cells with increasing concentrations of ATRA.
- (b) Violin plots for myeloid granulocyte and LSC- (non-engrafting, myeloid) enrichment scores after IPO11 knockdown in OCI-AML2 cells

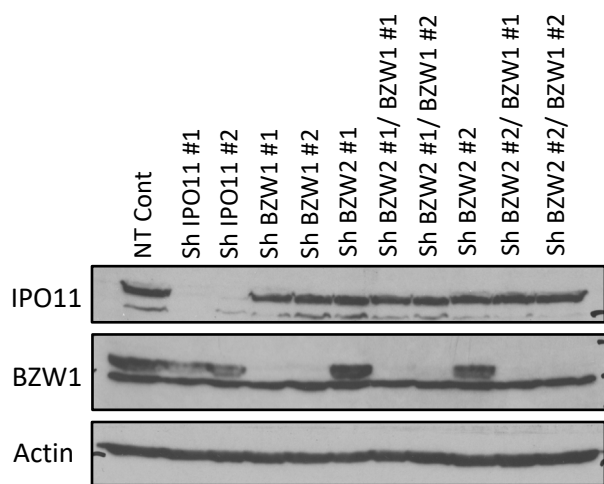

**Figure S6:** Confirmation of IPO11 and BZW1KD by western blot analysis



| Mutated gene  | Pearson correlation with gene expressions |                           | Two-sample t-test p-values with mutation |               | Fisher's exact t-test p-values with mutation |          | Numbers of mutations |                            |                                          |
|---------------|-------------------------------------------|---------------------------|------------------------------------------|---------------|----------------------------------------------|----------|----------------------|----------------------------|------------------------------------------|
|               | Correlation                               | Correlation test p-values |                                          | Without plate | With plate                                   | 2 groups | 3 groups             | 2 groups (86/84) (down/up) | 3 groups (49/77/44) (lower/middle/upper) |
|               |                                           | Without plate             | With plate                               |               |                                              |          |                      |                            |                                          |
| <b>KIT</b>    | 0.487                                     | 1.73e-11                  | 3.47e-12                                 | 9.63e-01      | 9.86e-01                                     | 4.43e-01 | 1.00e+00             | 5/2                        | 1/5/1                                    |
| <b>DNMT3A</b> | 0.467                                     | 1.34e-10                  | 7.48e-13                                 | 2.43e-01      | 9.60e-02                                     | 8.60e-01 | 8.16e-01             | 22/20                      | 14/17/11                                 |
| <b>NRAS</b>   | 0.427                                     | 6.12e-09                  | 1.12e-05                                 | 5.92e-01      | 5.50e-01                                     | 1.00e+00 | 7.18e-01             | 6/6                        | 5/4/3                                    |
| <b>NPM1</b>   | 0.425                                     | 7.46e-09                  | 6.69e-07                                 | 6.72e-05      | 2.16e-06                                     | 1.63e-02 | 8.99e-04             | 31/16                      | 24/16/7                                  |
| <b>RUNX1</b>  | 0.251                                     | 9.50e-04                  | 1.38e-02                                 | 5.31e-01      | 8.08e-01                                     | 3.04e-01 | 6.01e-01             | 6/10                       | 1/13/2                                   |
| <b>WT1</b>    | 0.227                                     | 2.96e-03                  | 3.41e-04                                 | 5.39e-01      | 6.72e-01                                     | 1.00e+00 | 2.21e-01             | 5/5                        | 0/8/2                                    |
| <b>TP53</b>   | 0.204                                     | 7.67e-03                  | 4.00e-02                                 | 1.07e-01      | 1.58e-02                                     | 4.01e-01 | 1.86e-01             | 5/8                        | 1/8/4                                    |
| <b>IDH2</b>   | 0.127                                     | 9.79e-02                  | 1.26e-03                                 | 2.61e-01      | 7.62e-02                                     | 8.03e-01 | 1.00e+00             | 8/9                        | 5/8/4                                    |
| <b>FLT3</b>   | 0.031                                     | 6.88e-01                  | 9.21e-01                                 | 3.82e-01      | 1.30e-01                                     | 3.97e-01 | 6.53e-01             | 27/21                      | 16/20/12                                 |
| <b>TET2</b>   | 0.03                                      | 6.99e-01                  | 1.50e-01                                 | 4.69e-01      | 6.82e-01                                     | 4.29e-01 | 7.04e-01             | 6/9                        | 3/8/4                                    |
| <b>IDH1</b>   | 0.013                                     | 8.67e-01                  | 4.38e-01                                 | 5.98e-01      | 6.38e-01                                     | 4.32e-01 | 7.44e-01             | 10/6                       | 6/6/4                                    |
| <b>CEBPA</b>  | -0.289                                    | 1.29e-04                  | 1.05e-02                                 | 6.55e-02      | 2.83e-03                                     | 4.63e-02 | 1.43e-01             | 3/10                       | 2/5/6                                    |

**Table S2:** Analysis of molecular mutations in correlation with IPO11 expression in newly diagnosed AML patients

| Sample # | Sex    | Age at Dx | Diagnosis | FAB Classification | Molecular                                                   | Cytogenetics                                                                          | Sample Status |
|----------|--------|-----------|-----------|--------------------|-------------------------------------------------------------|---------------------------------------------------------------------------------------|---------------|
| 110661   | Female | 62        | AML       | M1                 | NPM1 positive, FLT3-TKD undetectable, FLT3-ITD undetectable | 46,XX [20]                                                                            | diagnosis     |
| 0512     | Male   | 61        | AML       | M2                 |                                                             | 46,XY,dup(1)(q21q32)[4]/49,XY,+8,+9,+13[4]/46,XY[12]                                  | diagnosis     |
| 100864   | Male   | 42        | AML       | M6                 | NPM1 positive, FLT3-TKD positive, FLT3-ITD undetectable     | 46,XY[20]                                                                             | relapse       |
| 120858   | Female | 55        | AML       | M4                 | NPM1 positive, FLT3-TKD positive, FLT3-ITD positive         | 46,XX[20]                                                                             | relapse       |
| 120287   | Male   | 77        | AML       | M1                 | NPM1 positive, FLT3-TKD undetectable, FLT3-ITD positive     | 46,XY[20]                                                                             | diagnosis     |
| 140863   | Male   | 70        | AML       |                    |                                                             | 42~45,XY,-3,-5,del(7)(q21),der(12)t(12;?16)(p13;?11.2),-13,-14,-16,-20,+r,+4mar[cp10] | diagnosis     |
| 130414   | Male   | 33        | AML       | M4                 | NPM1 positive, FLT3-TKD undetectable, FLT3-ITD positive     | 46,XY[20]                                                                             | relapse       |

**Table S3:** Patients clinical data

| <b>Cat Number</b> | <b>Source</b>     | <b>Company</b>       |
|-------------------|-------------------|----------------------|
| 21001-1-AP        | Rabbit polyclonal | <b>Proteintech</b>   |
| Ab96682           | Rabbit polyclonal | <b>Abcam</b>         |
| PA5-55386         | Rabbit polyclonal | <b>ThermoFischer</b> |

**Table S4:** Anti-BZW2 ab tested

**The predicted NLS(s) (score cutoff = 0.1)**

| Protein ID | Predicted NLS    | Start | Stop | The highest score of matches within the prediction |
|------------|------------------|-------|------|----------------------------------------------------|
| BZW1       | GQRFKTRKRDEKERFD | 13    | 28   | 0.685                                              |
| BZW1       | NQTIGARK         | 247   | 255  | 0.482                                              |
| BZW1       | KDINAVAASLRK     | 197   | 208  | 0.104                                              |

**The predicted NLS(s) (score cutoff = 0.1)**

| Protein ID | Predicted NLS      | Start | Stop | The highest score of matches within the prediction |
|------------|--------------------|-------|------|----------------------------------------------------|
| BZW2       | TGQRFKTRKRDEKEKFEP | 10    | 27   | 0.681                                              |
| BZW2       | RKANLDKR           | 208   | 215  | 0.435                                              |

**Table S5:** SeqNLS: Nuclear localization signal prediction based on frequent pattern mining and linear motif scoring

---

|                |                             |
|----------------|-----------------------------|
| <b>IPO11-F</b> | <b>TGCCAGCACTGTTGTTCTTC</b> |
| <b>IPO11-R</b> | CACGTCTCCAGTAGCGATCA        |
| <b>BZW1-F</b>  | CAGCAGCTTTTGCTGTGAAG        |
| <b>BZW1-R</b>  | GGTTTGCTGATTCCGAACAT        |
| <b>BZW2-F</b>  | CAGGAAGGAACTGCAGAAGG        |
| <b>BZW2-R</b>  | TGTTCCACTCAACAGCGTTC        |
| <b>TYK2-F</b>  | CCTCCTGGAGATCTGCTTTG        |
| <b>TYK2-R</b>  | TCTGGGTTGGCTCATAGGTC        |

---

**Table S6:** Primers used for qPCR analysis
